# Supplementary material for: Immunodetection of Pectic Epitopes, Arabinogalactan Proteins, and Extensins in Mucilage Cells from the Ovules of Pilosella officinarum Vaill. and Taraxacum officinale Agg. (Asteraceae)
Source: MDPI journal article supplement (doi:10.3390/ijms21249642), 2020-12-17
Supplement: s1 [file s1]

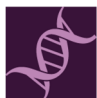

Supplementary Materials

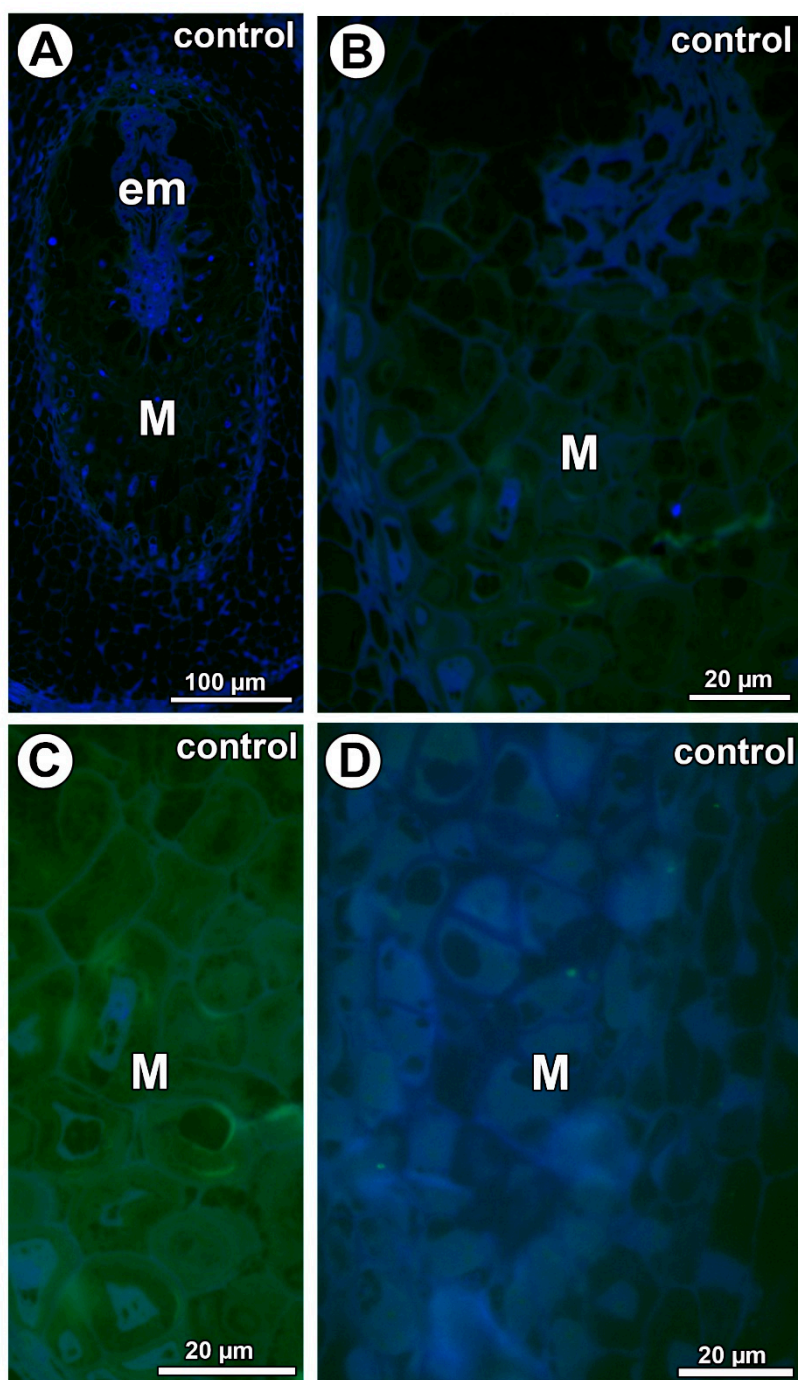

**Supplementary Figure 1.** Control reactions of immunolabeling of mucilage and cell wall components. (A,B) Section through the young seed of *Taraxacum officinale*, note embryo (em) and mucilage cells (M). (C) Mucilage cells (M) from *Taraxacum* seed. (D) Section through the ovule of *Pilosella officinarum* with mucilage cells (M).
